# Supplementary material
Source: PubMed Central journal article supplement (PMC3675919)
Supplement: AEM.00153-13_zam999104428so1.pdf [file AEM.00153-13_zam999104428so1.pdf]

## Supplementary Materials

Table S1. Pearson product-moment correlation coefficients of the LH metagenome taxonomic and functional reads under different cutoff *E values*  $\leq 10^{-5}$ ,  $10^{-10}$ ,  $10^{-15}$ , and  $10^{-20}$

| <b>Taxonomy</b> |                      | <b>1.00E-10</b> | <b>1.00E-15</b> | <b>1.00E-20</b> |
|-----------------|----------------------|-----------------|-----------------|-----------------|
| <b>1.00E-05</b> | <b>R<sup>2</sup></b> | 1               | 0.987563        | 0.73459         |
|                 | <b>P-value</b>       | < 2.2e-16       | < 2.2e-16       | 1.93E-05        |
| <b>Function</b> |                      |                 |                 |                 |
| <b>1.00E-05</b> | <b>R<sup>2</sup></b> | 0.999999        | 0.995174        | 0.908828        |
|                 | <b>P-value</b>       | < 2.2e-16       | < 2.2e-16       | 2.27E-11        |

TABLE S2. The percentages of genera related to the genes encoding enzymes facilitating nitrogen cycles in LH metagenome

| <b>Genus/Enzyme/EC</b>                              | <b>%</b> | <b>Phylum/Class of<br/>Proteobacteria</b> |
|-----------------------------------------------------|----------|-------------------------------------------|
| Copper-containing nitrite reductase<br>(EC 1.7.2.1) |          |                                           |
| <i>Burkholderia</i>                                 | 2.4      | <i>Betaproteobacteria</i>                 |
| <i>Bdellovibrio</i>                                 | 15       | <i>Deltaproteobacteria</i>                |
| <i>Propionibacterium</i>                            | 1.2      | <i>Actinobacteria</i>                     |
| <i>Gramella</i>                                     | 3.6      | <i>Bacteroidetes</i>                      |
| <i>Kangiella</i>                                    | 23       | <i>Gammaproteobacteria</i>                |
| <i>Neisseria</i>                                    | 7.1      | <i>Betaproteobacteria</i>                 |
| <i>Maribacter</i>                                   | 13       | <i>Bacteroidetes</i>                      |
| <i>Flavobacterium</i>                               | 32       | <i>Bacteroidetes</i>                      |
| <i>Leeuwenhoekiella</i>                             | 1.2      | <i>Bacteroidetes</i>                      |
| <i>Flavobacteria</i>                                | 1.2      | <i>Bacteroidetes</i>                      |
| Nitrous-oxide reductase<br>(EC 1.7.99.6/1.7.2.4)    |          |                                           |
| <i>Magnetospirillum</i>                             | 11       | <i>Alphaproteobacteria</i>                |
| <i>Campylobacter</i>                                | 68       | <i>Deltaproteobacteria</i>                |
| <i>Nitratiruptor</i>                                | 3.6      | <i>Deltaproteobacteria</i>                |
| <i>Sulfurovum</i>                                   | 11       | <i>Deltaproteobacteria</i>                |
| <i>Magnetospirillum</i>                             | 3.6      | <i>Alphaproteobacteria</i>                |
| <i>Gramella</i>                                     | 3.6      | <i>Bacteroidetes</i>                      |
| Nitrogenase (EC 1.18.6.1)                           |          |                                           |
| <i>Nostoc</i>                                       | 50       | <i>Cyanobacteria</i>                      |
| <i>Cyanothece</i>                                   | 50       | <i>Cyanobacteria</i>                      |
| Nitrite reductase [NAD(P)H]<br>(EC 1.7.1.4)         |          |                                           |
| <i>Thermobaculum</i>                                | 1.4      | <i>Bacteroidetes</i>                      |
| <i>Pseudomonas</i>                                  | 1.4      | <i>Gammaproteobacteria</i>                |
| <i>Cytophaga</i>                                    | 10       | <i>Cyanobacteria</i>                      |
| <i>Escherichia</i>                                  | 2.9      | <i>Gammaproteobacteria</i>                |
| <i>Spirosoma</i>                                    | 7.2      | <i>Bacteroidetes</i>                      |
| <i>Klebsiella</i>                                   | 2.9      | <i>Bacteroidetes</i>                      |
| <i>Polaromonas</i>                                  | 1.4      | <i>Betaproteobacteria</i>                 |
| <i>Geobacillus</i>                                  | 1.4      | <i>Firmicutes</i>                         |
| <i>Polaribacter</i>                                 | 11.6     | <i>Bacteroidetes</i>                      |

---

|                                                 |     |                              |
|-------------------------------------------------|-----|------------------------------|
| <i>Saccharophagus</i>                           | 1.4 | <i>Gammaproteobacteria</i>   |
| <i>Acinetobacter</i>                            | 2.8 | <i>Gammaproteobacteria</i>   |
| <i>Chitinophaga</i>                             | 7.2 | <i>Bacteroidetes</i>         |
| <i>Dyadobacter</i>                              | 2.9 | <i>Bacteroidetes</i>         |
| <i>Psychrobacter</i>                            | 10  | <i>Gammaproteobacteria</i>   |
| <i>Mycobacterium</i>                            | 1.4 | <i>Bacteroidetes</i>         |
| <i>Rhodoferax</i>                               | 1.4 | <i>Betaproteobacteria</i>    |
| <i>Dokdonia</i>                                 | 8.7 | <i>Bacteroidetes</i>         |
| <i>Leptothrix</i>                               | 2.9 | <i>Betaproteobacteria</i>    |
| <i>Psychromonas</i>                             | 4.3 | <i>Gammaproteobacteria</i>   |
| <i>Methylococcus</i>                            | 2.8 | <i>Gammaproteobacteria</i>   |
| <i>Thiobacillus</i>                             | 1.4 | <i>Betaproteobacteria</i>    |
| <i>Sorangium</i>                                | 5.8 | <i>Deltaproteobacteria</i>   |
| <i>Croceibacter</i>                             | 5.8 | <i>Bacteroidetes</i>         |
| Ferredoxin--nitrite reductase (EC 1.7.7.1)      |     |                              |
| <i>Synechocystis</i>                            | 24  | <i>Cyanobacteria</i>         |
| <i>Cyanothece</i>                               | 16  | <i>Cyanobacteria</i>         |
| <i>Trichodesmium</i>                            | 8   | <i>Cyanobacteria</i>         |
| <i>Nostoc</i>                                   | 44  | <i>Cyanobacteria</i>         |
| <i>Thermosynechococcus</i>                      | 4   | <i>Cyanobacteria</i>         |
| <i>Microcystis</i>                              | 4   | <i>Cyanobacteria</i>         |
| Assimilatory nitrate reductase<br>(EC 1.7.99.4) |     |                              |
| <i>RhodoPseudomonas</i>                         | 0.7 | <i>Alphaproteobacteria</i>   |
| <i>Flavobacterium</i>                           | 0.7 | <i>Bacteroidetes</i>         |
| <i>Psychrobacter</i>                            | 30  | <i>Gammaproteobacteria</i>   |
| <i>Thermobaculum</i>                            | 0.7 | <i>Unclassified Bacteria</i> |
| <i>Streptosporansium</i>                        | 0.7 | <i>Actinobacteria</i>        |
| <i>Bacillus</i>                                 | 5.7 | <i>Firmicutes</i>            |
| <i>Trichodesmium</i>                            | 1.4 | <i>Cyanobacteria</i>         |
| <i>Mycobacterium</i>                            | 0.7 | <i>Bacteroidetes</i>         |
| <i>Methylococcus</i>                            | 1.4 | <i>Gammaproteobacteria</i>   |
| <i>Burkholderia</i>                             | 2.8 | <i>Betaproteobacteria</i>    |
| <i>Pectobacterium</i>                           | 0.7 | <i>Gammaproteobacteria</i>   |
| <i>Cyanothece</i>                               | 4.3 | <i>Cyanobacteria</i>         |
| <i>Shewanella</i>                               | 0.7 | <i>Gammaproteobacteria</i>   |
| <i>Pseudomonas</i>                              | 0.7 | <i>Gammaproteobacteria</i>   |
| <i>Bradyrhizobium</i>                           | 2.2 | <i>Gammaproteobacteria</i>   |

---

---

|                          |     |                            |
|--------------------------|-----|----------------------------|
| <i>Azoarcus</i>          | 0.7 | <i>Betaproteobacteria</i>  |
| <i>Alcanivorax</i>       | 1.4 | <i>Gammaproteobacteria</i> |
| <i>Anabaena</i>          | 6.5 | <i>Cyanobacteria</i>       |
| <i>Chitinophaga</i>      | 0.7 | <i>Bacteroidetes</i>       |
| <i>Cytophaga</i>         | 2.9 | <i>Bacteroidetes</i>       |
| <i>Rhodococcus</i>       | 0.7 | <i>Actinobacteria</i>      |
| <i>Marinomonas</i>       | 0.7 | <i>Gammaproteobacteria</i> |
| <i>Roseobacter</i>       | 1.4 | <i>Alphaproteobacteria</i> |
| <i>Nostoc</i>            | 12  | <i>Cyanobacteria</i>       |
| <i>Methylibium</i>       | 2.2 | <i>Betaproteobacteria</i>  |
| <i>Pseudoalteromonas</i> | 0.7 | <i>Gammaproteobacteria</i> |
| <i>Microcystis</i>       | 2.2 | <i>Cyanobacteria</i>       |
| <i>Polaromonas</i>       | 0.7 | <i>Betaproteobacteria</i>  |
| <i>Novosphingobium</i>   | 0.7 | <i>Alphaproteobacteria</i> |
| <i>Crocospaera</i>       | 0.7 | <i>Cyanobacteria</i>       |
| <i>Thiobacillus</i>      | 2.2 | <i>Betaproteobacteria</i>  |
| <i>Pseudomonas</i>       | 0.7 | <i>Gammaproteobacteria</i> |
| <i>Azorhizobium</i>      | 2.2 | <i>Alphaproteobacteria</i> |
| <i>Acidovorax</i>        | 1.4 | <i>Betaproteobacteria</i>  |
| <i>Maribacter</i>        | 0.7 | <i>Bacteroidetes</i>       |
| <i>Acinetobacter</i>     | 2.2 | <i>Gammaproteobacteria</i> |
| <i>Mesorhizobium</i>     | 0.7 | <i>Alphaproteobacteria</i> |
| <i>Rhizobium</i>         | 1.4 | <i>Alphaproteobacteria</i> |

---

TABLE S3. The percentages of genera related to the genes encoding enzymes facilitating Sulfate reduction in LH metagenome

| <b>Genus/Enzyme/EC</b>                  | <b>%</b> | <b>Phylum/Class of<br/>Proteobacteria</b> |
|-----------------------------------------|----------|-------------------------------------------|
| Adenylylsulfate kinase<br>(EC 2.7.1.25) |          |                                           |
| <i>Roseiflexus</i>                      | 16.3     | <i>Chloroflexi</i>                        |
| <i>Aquifex</i>                          | 16.3     | <i>Aquificae</i>                          |
| <i>Chloroflexus</i>                     | 5.8      | <i>Chloroflexi</i>                        |
| <i>Schizosaccharomyces</i>              | 5.2      | <i>Opisthokonta</i>                       |
| <i>Caulobacter</i>                      | 4.6      | <i>Alphaproteobacteria</i>                |
| <i>Halothermothrix</i>                  | 4.7      | <i>Firmicutes</i>                         |
| <i>Xanthomonas</i>                      | 3.5      | <i>Gammaproteobacteria</i>                |
| <i>Paracoccus</i>                       | 2.9      | <i>Alphaproteobacteria</i>                |
| <i>Zymomonas</i>                        | 2.9      | <i>Alphaproteobacteria</i>                |
| <i>Trichodesmium</i>                    | 2.3      | <i>Cyanobacteria</i>                      |
| <i>Cyanothece</i>                       | 2.3      | <i>Cyanobacteria</i>                      |
| <i>Bacteroides</i>                      | 1.7      | <i>Bacteroidetes</i>                      |
| <i>Erythrobacter</i>                    | 1.7      | <i>Alphaproteobacteria</i>                |
| <i>Magnetococcus</i>                    | 1.7      | <i>Alphaproteobacteria</i>                |
| <i>Microcystis</i>                      | 1.7      | <i>Cyanobacteria</i>                      |
| <i>Solibacter</i>                       | 1.7      | <i>Acidobacteria</i>                      |
| <i>Francisella</i>                      | 1.8      | <i>Gammaproteobacteria</i>                |
| <i>Pseudomonas</i>                      | 1.8      | <i>Gammaproteobacteria</i>                |
| <i>Vibrio</i>                           | 1.2      | <i>Gammaproteobacteria</i>                |
| <i>Burkholderia</i>                     | 1.2      | <i>Betaproteobacteria</i>                 |
| <i>Chlorobium</i>                       | 1.2      | <i>Bacteroidetes</i>                      |
| <i>Deinococcus</i>                      | 1.2      | <i>Deinococcus</i>                        |
| <i>Frankia</i>                          | 1.2      | <i>Actinobacteria</i>                     |
| <i>Hydrogenobaculum</i>                 | 1.2      | <i>Aquificae</i>                          |
| <i>Oceanobacillus</i>                   | 1.2      | <i>Firmicutes</i>                         |
| <i>Rhodopseudomonas</i>                 | 1.2      | <i>Alphaproteobacteria</i>                |
| <i>Synechocystis</i>                    | 1.2      | <i>Cyanobacteria</i>                      |
| <i>Ashbya</i>                           | 0.6      | <i>Opisthokonta</i>                       |
| <i>Aurantimonas</i>                     | 0.6      | <i>Alphaproteobacteria</i>                |
| <i>Campylobacter</i>                    | 0.6      | <i>Deltaproteobacteria</i>                |
| <i>Crocospaera</i>                      | 0.6      | <i>Cyanobacteria</i>                      |
| <i>Delftia</i>                          | 0.6      | <i>Betaproteobacteria</i>                 |

---

|                                                                                                                               |      |                            |
|-------------------------------------------------------------------------------------------------------------------------------|------|----------------------------|
| <i>Geobacter</i>                                                                                                              | 0.6  | <i>Deltaproteobacteria</i> |
| <i>Methylococcus</i>                                                                                                          | 0.6  | <i>Gammaproteobacteria</i> |
| <i>Mycobacterium</i>                                                                                                          | 0.6  | <i>Actinobacteria</i>      |
| <i>Neurospora</i>                                                                                                             | 0.6  | <i>Opisthokonta</i>        |
| <i>Oceanicaulis</i>                                                                                                           | 0.6  | <i>Alphaproteobacteria</i> |
| <i>Parvibaculum</i>                                                                                                           | 0.6  | <i>Alphaproteobacteria</i> |
| <i>Pelobacter</i>                                                                                                             | 0.6  | <i>Deltaproteobacteria</i> |
| <i>Prochlorococcus</i>                                                                                                        | 0.6  | <i>Cyanobacteria</i>       |
| <i>Roseobacter</i>                                                                                                            | 0.6  | <i>Alphaproteobacteria</i> |
| <i>Shewanella</i>                                                                                                             | 0.6  | <i>Gammaproteobacteria</i> |
| <i>Sphingomonas</i>                                                                                                           | 0.6  | <i>Alphaproteobacteria</i> |
| <i>Thermobispora</i>                                                                                                          | 0.6  | <i>Actinobacteria</i>      |
| <i>Thermosynechococcus</i>                                                                                                    | 0.6  | <i>Cyanobacteria</i>       |
| Phosphoadenylyl-sulfate reductase<br>[thioredoxin] (EC 1.8.4.8)/<br>Adenylyl-sulfate reductase<br>[thioredoxin] (EC 1.8.4.10) |      |                            |
| <i>Marinobacter</i>                                                                                                           | 29.2 | <i>Gammaproteobacteria</i> |
| <i>Acinetobacter</i>                                                                                                          | 17   | <i>Gammaproteobacteria</i> |
| <i>Azotobacter</i>                                                                                                            | 9.8  | <i>Gammaproteobacteria</i> |
| <i>Reinekea</i>                                                                                                               | 9.8  | <i>Gammaproteobacteria</i> |
| <i>Cyanothece</i>                                                                                                             | 4.8  | <i>Cyanobacteria</i>       |
| <i>Pseudomonas</i>                                                                                                            | 4.8  | <i>Gammaproteobacteria</i> |
| <i>Crocospaera</i>                                                                                                            | 4.9  | <i>Cyanobacteria</i>       |
| <i>Hahella</i>                                                                                                                | 4.9  | <i>Gammaproteobacteria</i> |
| <i>Alkalilimnicola</i>                                                                                                        | 2.4  | <i>Gammaproteobacteria</i> |
| <i>Anabaena</i>                                                                                                               | 2.4  | <i>Cyanobacteria</i>       |
| <i>Bordetella</i>                                                                                                             | 2.4  | <i>Betaproteobacteria</i>  |
| <i>Cellvibrio</i>                                                                                                             | 2.4  | <i>Gammaproteobacteria</i> |
| <i>Croceibacter</i>                                                                                                           | 2.4  | <i>Bacteroidetes</i>       |
| <i>Nostoc</i>                                                                                                                 | 2.4  | <i>Cyanobacteria</i>       |
| Sulfate adenylyltransferase,<br>dissimilatory-type (EC 2.7.7.4)                                                               |      |                            |
| <i>Aquifex</i>                                                                                                                | 12.6 | <i>Aquificae</i>           |
| <i>Roseiflexus</i>                                                                                                            | 12.7 | <i>Chloroflexi</i>         |
| <i>Anabaena</i>                                                                                                               | 5.9  | <i>Cyanobacteria</i>       |
| <i>Chloroflexus</i>                                                                                                           | 4.5  | <i>Chloroflexi</i>         |
| <i>Cytophaga</i>                                                                                                              | 3.6  | <i>Cyanobacteria</i>       |

---

---

|                            |     |                            |
|----------------------------|-----|----------------------------|
| <i>Synechococcus</i>       | 4.2 | <i>Cyanobacteria</i>       |
| <i>Caulobacter</i>         | 3.7 | <i>Alphaproteobacteria</i> |
| <i>Nitrosococcus</i>       | 1.8 | <i>Gammaproteobacteria</i> |
| <i>Xanthomonas</i>         | 3.3 | <i>Gammaproteobacteria</i> |
| <i>Nostoc</i>              | 2.7 | <i>Cyanobacteria</i>       |
| <i>Maribacter</i>          | 3.7 | <i>Bacteroidetes</i>       |
| <i>Paracoccus</i>          | 2.3 | <i>Alphaproteobacteria</i> |
| <i>Microcystis</i>         | 1.8 | <i>Cyanobacteria</i>       |
| <i>Thermosynechococcus</i> | 1.8 | <i>Cyanobacteria</i>       |
| <i>Pseudomonas</i>         | 1.4 | <i>Gammaproteobacteria</i> |
| <i>Trichodesmium</i>       | 1.4 | <i>Cyanobacteria</i>       |
| <i>Erythrobacter</i>       | 1.4 | <i>Alphaproteobacteria</i> |
| <i>Francisella</i>         | 1.4 | <i>Gammaproteobacteria</i> |
| <i>Leeuwenhoekiella</i>    | 2.3 | <i>Bacteroidetes</i>       |
| <i>Magnetococcus</i>       | 1.4 | <i>Alphaproteobacteria</i> |
| <i>Pseudoalteromonas</i>   | 1.9 | <i>Gammaproteobacteria</i> |
| <i>Robiginitalea</i>       | 2.3 | <i>Bacteroidetes</i>       |
| <i>Streptosporangium</i>   | 1.4 | <i>Actinobacteria</i>      |
| <i>Aeropyrum</i>           | 0.9 | <i>Crenarchaeota</i>       |
| <i>Bacillus</i>            | 0.9 | <i>Firmicutes</i>          |
| <i>Deinococcus</i>         | 0.9 | <i>Deinococcus</i>         |
| <i>Hydrogenobaculum</i>    | 0.9 | <i>Aquificae</i>           |
| <i>Pyrococcus</i>          | 0.9 | <i>Euryarchaeota</i>       |
| <i>Frankia</i>             | 0.9 | <i>Actinobacteria</i>      |
| <i>RhodoPseudomonas</i>    | 0.9 | <i>Alphaproteobacteria</i> |
| <i>Saccharophagus</i>      | 0.9 | <i>Gammaproteobacteria</i> |
| <i>Cyanothece</i>          | 0.5 | <i>Cyanobacteria</i>       |
| <i>Ferroplasma</i>         | 0.5 | <i>Euryarchaeota</i>       |
| <i>Neurospora</i>          | 0.5 | <i>Opisthokonta</i>        |
| <i>Petrogala</i>           | 0.5 | <i>Thermotogae</i>         |
| <i>Roseobacter</i>         | 0.5 | <i>Alphaproteobacteria</i> |
| <i>Staphylococcus</i>      | 0.5 | <i>Firmicutes</i>          |
| <i>Staphylothermus</i>     | 0.5 | <i>Crenarchaeota</i>       |
| <i>Thermobispora</i>       | 0.5 | <i>Actinobacteria</i>      |
| <i>Flavobacterium</i>      | 0.5 | <i>Bacteroidetes</i>       |
| <i>Geobacter</i>           | 0.5 | <i>Deltaproteobacteria</i> |
| <i>Hahella</i>             | 0.5 | <i>Gammaproteobacteria</i> |
| <i>Kytococcus</i>          | 0.5 | <i>Actinobacteria</i>      |

---

---

|                                                                                                                                                                                                     |      |                            |
|-----------------------------------------------------------------------------------------------------------------------------------------------------------------------------------------------------|------|----------------------------|
| <i>Opitutus</i>                                                                                                                                                                                     | 1    | <i>Verrucomicrobia</i>     |
| <i>Psychromonas</i>                                                                                                                                                                                 | 1    | <i>Gammaproteobacteria</i> |
| <i>Aurantimonas</i>                                                                                                                                                                                 | 0.5  | <i>Alphaproteobacteria</i> |
| <i>Chromobacterium</i>                                                                                                                                                                              | 0.5  | <i>Betaproteobacteria</i>  |
| <i>Leptospira</i>                                                                                                                                                                                   | 0.5  | <i>Spirochaetes</i>        |
| <i>Methylococcus</i>                                                                                                                                                                                | 0.5  | <i>Gammaproteobacteria</i> |
| <i>Mycobacterium</i>                                                                                                                                                                                | 0.5  | <i>Actinobacteria</i>      |
| <i>Nocardioides</i>                                                                                                                                                                                 | 0.5  | <i>Actinobacteria</i>      |
| <i>Oceanicaulis</i>                                                                                                                                                                                 | 0.5  | <i>Alphaproteobacteria</i> |
| <i>Parvibaculum</i>                                                                                                                                                                                 | 0.5  | <i>Alphaproteobacteria</i> |
| <i>Pelobacter</i>                                                                                                                                                                                   | 0.5  | <i>Deltaproteobacteria</i> |
| <i>Salmonella</i>                                                                                                                                                                                   | 0.5  | <i>Gammaproteobacteria</i> |
| <i>Shewanella</i>                                                                                                                                                                                   | 0.5  | <i>Gammaproteobacteria</i> |
| <i>Sphingomonas</i>                                                                                                                                                                                 | 0.5  | <i>Alphaproteobacteria</i> |
| <i>Nitrosomonas</i>                                                                                                                                                                                 | 1.8  | <i>Betaproteobacteria</i>  |
| Sulfite reductase (EC 1.8.99.1)/<br>Ferredoxin--sulfite reductase (EC<br>1.8.7.1)/ Sulfite reductase<br>[NADPH] hemoprotein (EC<br>1.8.1.2)/ Sulfite reductase,<br>dissimilatory-type (EC 1.8.99.3) |      |                            |
| <i>Thiobacillus</i>                                                                                                                                                                                 | 31.3 | <i>Betaproteobacteria</i>  |
| <i>Nostoc</i>                                                                                                                                                                                       | 10.8 | <i>Cyanobacteria</i>       |
| <i>Cyanothece</i>                                                                                                                                                                                   | 9.9  | <i>Cyanobacteria</i>       |
| <i>Synechocystis</i>                                                                                                                                                                                | 8.9  | <i>Cyanobacteria</i>       |
| <i>Alkalilimnicola</i>                                                                                                                                                                              | 6.3  | <i>Gammaproteobacteria</i> |
| <i>Anabaena</i>                                                                                                                                                                                     | 5.4  | <i>Cyanobacteria</i>       |
| <i>Thioalkalivibrio</i>                                                                                                                                                                             | 4.5  | <i>Gammaproteobacteria</i> |
| <i>Microcystis</i>                                                                                                                                                                                  | 3.6  | <i>Cyanobacteria</i>       |
| <i>Xanthomonas</i>                                                                                                                                                                                  | 2.7  | <i>Gammaproteobacteria</i> |
| <i>Magnetospirillum</i>                                                                                                                                                                             | 2.7  | <i>Alphaproteobacteria</i> |
| <i>Xylella</i>                                                                                                                                                                                      | 1.8  | <i>Gammaproteobacteria</i> |
| <i>Vesicomysocius</i>                                                                                                                                                                               | 1.8  | <i>Gammaproteobacteria</i> |
| <i>Trichodesmium</i>                                                                                                                                                                                | 1.8  | <i>Cyanobacteria</i>       |
| <i>Shewanella</i>                                                                                                                                                                                   | 0.9  | <i>Gammaproteobacteria</i> |
| <i>Polaribacter</i>                                                                                                                                                                                 | 0.9  | <i>Bacteroidetes</i>       |
| <i>Nitrospira</i>                                                                                                                                                                                   | 0.9  | <i>Betaproteobacteria</i>  |
| <i>Myxococcus</i>                                                                                                                                                                                   | 0.9  | <i>Deltaproteobacteria</i> |

---



---

|                               |      |                            |
|-------------------------------|------|----------------------------|
| <i>Halorhodospira</i>         | 0.9  | <i>Gammaproteobacteria</i> |
| <i>Flavobacterium</i>         | 0.9  | <i>Bacteroidetes</i>       |
| <i>Crocospaera</i>            | 0.9  | <i>Cyanobacteria</i>       |
| <i>Chromobacterium</i>        | 0.9  | <i>Betaproteobacteria</i>  |
| <i>Acinetobacter</i>          | 0.9  | <i>Gammaproteobacteria</i> |
| Sulfur oxidation protein SoxB |      |                            |
| <i>Thiomicrospira</i>         | 20.2 | <i>Gammaproteobacteria</i> |
| <i>Chlorobium</i>             | 15.9 | <i>Bacteroidetes</i>       |
| <i>Dechloromonas</i>          | 12.6 | <i>Betaproteobacteria</i>  |
| <i>Herminiimonas</i>          | 7.9  | <i>Betaproteobacteria</i>  |
| <i>Thiobacillus</i>           | 6.3  | <i>Betaproteobacteria</i>  |
| <i>Congregibacter</i>         | 5.6  | <i>Gammaproteobacteria</i> |
| <i>Janthinobacterium</i>      | 5.3  | <i>Betaproteobacteria</i>  |
| <i>Chlorobaculum</i>          | 4.3  | <i>Bacteroidetes</i>       |
| <i>Polaromonas</i>            | 3.6  | <i>Betaproteobacteria</i>  |
| <i>Bradyrhizobium</i>         | 3.3  | <i>Alphaproteobacteria</i> |
| <i>Ralstonia</i>              | 3.0  | <i>Betaproteobacteria</i>  |
| <i>Vesicomysocius</i>         | 2.6  | <i>Gammaproteobacteria</i> |
| <i>Pelodictyon</i>            | 2.0  | <i>Bacteroidetes</i>       |
| <i>Thioalkalivibrio</i>       | 1.3  | <i>Gammaproteobacteria</i> |
| <i>Nitrobacter</i>            | 1.3  | <i>Alphaproteobacteria</i> |
| <i>Acidiphilium</i>           | 1.3  | <i>Alphaproteobacteria</i> |
| <i>Polynucleobacter</i>       | 1.0  | <i>Betaproteobacteria</i>  |
| <i>Methylobacterium</i>       | 0.7  | <i>Alphaproteobacteria</i> |
| <i>Arcobacter</i>             | 0.7  | <i>Deltaproteobacteria</i> |
| <i>Oligotropha</i>            | 0.3  | <i>Alphaproteobacteria</i> |
| <i>Anaeromyxobacter</i>       | 0.3  | <i>Deltaproteobacteria</i> |

---

TABLE S4. Representatives of genes/proteins related to oxidative stress in LH metagnome

| Function         | Protein names                                  | Unique hits | Total hits | Phyla                                                                                                                                                                                                                                                       |
|------------------|------------------------------------------------|-------------|------------|-------------------------------------------------------------------------------------------------------------------------------------------------------------------------------------------------------------------------------------------------------------|
| Oxidative stress | Catalase                                       | 67          | 29592      | <i>Bacteroidetes</i> (74.0%),<br><i>Cyanobacteria</i> (11.0%),<br><i>Proteobacteria</i> (11.6%),<br><i>Acidobacteria</i> (1.1%), <i>Chlorobi</i> (0.3%),<br><i>Actinobacteria</i> (1.3%),<br><i>Firmicutes</i> (0.5%),<br><i>Deinococcus-Thermus</i> (0.2%) |
|                  | Superoxide dismutase                           | 46          | 57074      | <i>Cyanobacteria</i> (66.9%),<br><i>Bacteroidetes</i> (29.4%), <i>Chloroflexi</i> (0.4%),<br><i>Proteobacteria</i> (2.9%),<br><i>Bacteria</i> (0.3%), <i>Firmicutes</i> (0.3%),<br><i>Thermotoga</i> (0.1%)                                                 |
|                  | Peroxidase                                     | 41          | 18062      | <i>Bacteroidetes</i> (65.8%),<br><i>Cyanobacteria</i> (18.0%),<br><i>Proteobacteria</i> (11.9%),<br><i>Acidobacteria</i> (1.7%), <i>Chlorobi</i> (0.5%),<br><i>Firmicutes</i> (0.5%),<br><i>Actinobacteria</i> (1.6%)                                       |
|                  | Iron-binding ferritin-like antioxidant protein | 17          | 19709      | <i>Cyanobacteria</i> (28.4%),<br><i>Bacteroidetes</i> (66.2%),<br><i>Proteobacteria</i> (5.4%)                                                                                                                                                              |
|                  | Organic hydroperoxide resistant protein        | 11          | 609        | <i>Verrucomicrobia</i> (71.8%),<br><i>Firmicutes</i> (28.2%)                                                                                                                                                                                                |

TABLE S5. Representatives of genes/proteins related to osmotic stress in LH metagenome

| Function                                            | Protein names                                                   | Unique | Total | Phyla                                                                                                                                                                                     |
|-----------------------------------------------------|-----------------------------------------------------------------|--------|-------|-------------------------------------------------------------------------------------------------------------------------------------------------------------------------------------------|
|                                                     |                                                                 | hits   | hits  |                                                                                                                                                                                           |
| Synthesis of osmoregulated periplasmic glucan       | Cyclic beta-1,2-glucan synthase                                 | 34     | 4475  | <i>Acidobacteria</i> (12.1%),<br><i>Proteobacteria</i> (57.8%),<br><i>Chloroflexi</i> (15.6%),<br><i>Planctomycetes</i> (5.4%),<br><i>Firmicutes</i> (7.3),<br><i>Euryarchaeota</i> (1.8) |
|                                                     | Glucans biosynthesis protein C                                  | 3      | 2563  | <i>Bacteroidetes</i> (95.3%),<br><i>Proteobacteria</i> (4.7%)                                                                                                                             |
| Choline and Betaine Uptake and Betaine Biosynthesis | Sarcosine oxidase                                               | 30     | 10504 | <i>Acidobacteria</i> (7.4%),<br><i>Actinobacteria</i> (30.0%),<br><i>Proteobacteria</i> (62.6%)                                                                                           |
|                                                     | L-proline glycine betaine ABC transport system permease protein | 14     | 4233  | <i>Acidobacteria</i> (64.6%),<br><i>Proteobacteria</i> (30.0%),<br><i>Actinobacteria</i> (3.2%),<br><i>Firmicutes</i> (2.2%)                                                              |
|                                                     | Choline dehydrogenase                                           | 12     | 8386  | <i>Cyanobacteria</i> (88.4%),<br><i>Proteobacteria</i> (6.9%),<br><i>Actinobacteria</i> (4.7%)                                                                                            |
|                                                     | Betaine aldehyde dehydrogenase                                  | 2      | 7     | <i>Fungi</i> (85.7%),<br><i>Proteobacteria</i> (14.3%)                                                                                                                                    |

TABLE S6. Representatives of genes/proteins related to cold adaptation in LH metagenome

| Functions                   | Protein or subsystem names           | Unique hits | Total hits | Phyla                                                                                                                                                                                                                          |
|-----------------------------|--------------------------------------|-------------|------------|--------------------------------------------------------------------------------------------------------------------------------------------------------------------------------------------------------------------------------|
| DNA replication             | gyrA<br>(DNA Gyrase A)               | 96          | 58535      | <i>Cyanobacteria</i> (55.6%),<br><i>Bacteroidetes</i> (40.8%),<br><i>Proteobacteria</i> (2.3%),<br><i>Actinobacteria</i> (0.6%),<br><i>Firmicutes</i> (0.7%)                                                                   |
|                             | recA<br>(Recombination factor A)     | 36          | 28954      | <i>Cyanobacteria</i> (48.4%),<br><i>Bacteroidetes</i> (46.5%),<br><i>Proteobacteria</i> (2.6%),<br><i>Chlorobi</i> (0.3%),<br><i>Deinococcus-Thermus</i> (0.3%),<br><i>Actinobacteria</i> (1.8%),<br><i>Chloroflexi</i> (0.1%) |
|                             | dnaA (Replication initiator Protein) | 30          | 28928      | <i>Cyanobacteria</i> (33.7%),<br><i>Bacteroidetes</i> (63.4%),<br><i>Actinobacteria</i> (1.0%),<br><i>Proteobacteria</i> (1.5%),<br><i>Deinococcus-Thermus</i> (0.4%)                                                          |
| Unsaturated fatty acids     | Fatty acid desaturases               | 36          | 54030      | <i>Cyanobacteria</i> (99.7%),<br><i>Proteobacteria</i> (0.3%)                                                                                                                                                                  |
|                             | dnaJ                                 | 53          | 57229      | <i>Cyanobacteria</i> (75.3%),<br><i>Bacteroidetes</i> (21.3%),<br><i>Proteobacteria</i> (2.9%),<br><i>Firmicutes</i> (0.4%),<br><i>Actinobacteria</i> (0.1%)                                                                   |
| Protein folding             | Prolyl-isomerase                     | 64          | 7063       | <i>Bacteroidetes</i> (60.5%),<br><i>Proteobacteria</i> (33.3%),<br><i>Acidobacteria</i> (4.4%),<br><i>Cyanobacteria</i> (1.5%),<br><i>Synergistetes</i> (0.3%)                                                                 |
| Nucleosides and Nucleotides | aceE                                 | 79          | 55118      | <i>Cyanobacteria</i> (57.0%),<br><i>Bacteroidetes</i> (38.5%),<br><i>Acidobacteria</i> (0.6%),<br><i>Proteobacteria</i> (3.0%),                                                                                                |

|                     |                                  |    |       |                                                                                                                                                                                                                                                                                                                                                                    |
|---------------------|----------------------------------|----|-------|--------------------------------------------------------------------------------------------------------------------------------------------------------------------------------------------------------------------------------------------------------------------------------------------------------------------------------------------------------------------|
| Pyruvate metabolism | aceF                             | 72 | 52841 | <i>Chloroflexi</i> (0.4%),<br><i>Actinobacteria</i> (0.3%),<br><i>Deinococcus-Thermus</i><br>(0.1%), <i>Chlamydiae</i> (0.1%)<br><i>Cyanobacteria</i> (49.6%),<br><i>Bacteroidetes</i> (43.3%)<br><i>Proteobacteria</i> (6.1%),<br><i>Acidobacteria</i> (0.6%),<br><i>Actinobacteria</i> (0.2%),<br><i>Deinococcus-Thermus</i><br>(0.1%), <i>Firmicutes</i> (0.1%) |
| Transcription       | nusA                             | 26 | 28035 | <i>Cyanobacteria</i> (49.4%),<br><i>Bacteroidetes</i> (45.3%),<br><i>Bacteria</i> (0.5%),<br><i>Firmicutes</i> (1.2%),<br><i>Actinobacteria</i> (3.6%)                                                                                                                                                                                                             |
| RNA helicase        | Cold-shock DEAD-box<br>protein A | 61 | 25563 | <i>Bacteroidetes</i> (49.8%)<br><i>Cyanobacteria</i> (48.4%)<br><i>Proteobacteria</i> (1.6%)<br><i>Methanococcales</i> (0.1%)<br><i>Firmicutes</i> (0.1%)<br><i>Verrucomicrobia</i> (1.0%)                                                                                                                                                                         |
|                     | cspA                             | 9  | 14    | <i>Bacteroidetes</i> (71.4%)<br><i>Proteobacteria</i> (21.4%)<br><i>Firmicutes</i> (7.2%)                                                                                                                                                                                                                                                                          |

---

TABLE S7. Dereplication hits of active bacterial 16S ribosomal cDNA based on 98% similarity

| No. of reads | Dereplicated representative | Best hit                                             | Accession No.   | Identity |
|--------------|-----------------------------|------------------------------------------------------|-----------------|----------|
| 103          | SB-1                        | <i>Verrucomicrobia</i> bacterium<br>SCGC AAA240-C14  | HQ675558.1      | 94%      |
| 84           | SB-2                        | <i>Stenotrophomonas</i> sp. NOE8                     | JX842835.1      | 100%     |
| 73           | SB-3                        | <i>Microlunatus panaciterrae</i><br>strain Gsoil 954 | NR_041517.<br>1 | 93%      |
| 73           | SB-4                        | <i>Rhodothalassium</i> sp. PHT1                      | HE806302.1      | 91%      |
| 65           | SB-5                        | <i>Pseudomonas aeruginosa</i><br>strain PM389        | JF899310.2      | 99%      |
| 63           | SB-6                        | <i>Roseateles</i> sp. R-45571                        | FR775142.1      | 98%      |
| 60           | SB-7                        | <i>Verrucomicrobia</i> bacterium<br>SCGC AAA240-C14  | HQ675558.1      | 95%      |
| 55           | SB-8                        | <i>Pedobacter heparinus</i>                          | AB680215.1      | 98%      |
| 54           | SB-9                        | <i>Pseudomonas aeruginosa</i><br>strain PM389        | JF899310.2      | 99%      |
| 43           | SB-10                       | <i>Enterobacter</i> sp. DHL-02                       | AB714445.1      | 99%      |
| 38           | SB-11                       | <i>Staphylococcus aureus</i> subsp.<br>aureus ST228  | HE579073.1      | 99%      |
| 31           | SB-12                       | <i>Desulfobulbus</i> sp.                             | AF132865.1      | 99%      |
| 30           | SB-13                       | <i>Stenotrophomonas</i> sp. NOE8                     | JX842835.1      | 99%      |
| 22           | SB-14                       | <i>Microlunatus panaciterrae</i><br>strain Gsoil 954 | NR_041517.<br>1 | 93%      |
| 17           | SB-15                       | <i>Delftia lacustris</i>                             | HE861943.1      | 100%     |
| 9            | SB-16                       | <i>Acidovorax</i> sp. CNE 29                         | FR749857.1      | 99%      |
| 7            | SB-17                       | <i>Enterobacter</i> sp. DHL-02                       | AB714445.1      | 99%      |
| 7            | SB-18                       | <i>Desulfobulbus</i> sp.                             | AF132865.1      | 98%      |
| 6            | SB-19                       | <i>Pseudomonas aeruginosa</i><br>strain PM389        | JF899310.2      | 98%      |
| 6            | SB-20                       | <i>Enterobacter</i> sp. DHL-02                       | AB714445.1      | 99%      |
| 6            | SB-21                       | <i>Stenotrophomonas</i> sp. NOE8                     | JX842835.1      | 99%      |
| 6            | SB-22                       | <i>Pseudomonas</i> sp. RB5-M5                        | JN019027.1      | 97%      |
| 5            | SB-23                       | <i>Staphylococcus aureus</i><br>08BA02176            | CP003808.1      | 99%      |
| 5            | SB-24                       | <i>Marinobacter</i> sp. V3H-008                      | JN106689.1      | 98%      |
| 5            | SB-25                       | <i>Verrucomicrobia</i> bacterium                     | HQ675558.1      | 95%      |

---

|   |       |                                                       |                 |     |
|---|-------|-------------------------------------------------------|-----------------|-----|
|   |       | SCGC AAA240-C14                                       |                 |     |
| 5 | SB-26 | <i>Micrococcus panaciterrae</i><br>strain Gsoil 954   | NR_041517.<br>1 | 94% |
| 5 | SB-27 | <i>Pseudomonas aeruginosa</i><br>strain PM389         | JF899310.2      | 99% |
| 5 | SB-28 | <i>Desulfobulbus</i> sp.                              | AF132865.1      | 99% |
| 4 | SB-29 | <i>Staphylococcus aureus</i> subsp.<br>aureus ST228   | HE579073.1      | 99% |
| 4 | SB-30 | <i>Micrococcus panaciterrae</i>                       | NR_041517.<br>1 | 93% |
| 4 | SB-31 | <i>Stenotrophomonas</i> sp. NOE8                      | JX842835.1      | 99% |
| 4 | SB-32 | <i>Pedobacter heparinus</i>                           | AB680215.1      | 98% |
| 4 | SB-33 | <i>Micrococcus panaciterrae</i><br>strain Gsoil 954   | NR_041517.<br>1 | 93% |
| 4 | SB-34 | <i>Micrococcus panaciterrae</i><br>strain Gsoil 954   | NR_041517.<br>1 | 93% |
| 4 | SB-35 | <i>Micrococcus panaciterrae</i><br>strain Gsoil 954   | NR_041517.<br>1 | 94% |
| 3 | SB-36 | <i>Verrucomicrobia</i> bacterium<br>SCGC AAA240-C14   | HQ675558.1      | 96% |
| 3 | SB-37 | <i>Stenotrophomonas maltophilia</i><br>strain BXCC-58 | JF431276.1      | 98% |
| 3 | SB-38 | <i>Pseudomonas</i> sp. PC IW 25                       | FM164626.1      | 98% |
| 3 | SB-39 | <i>Pseudomonas aeruginosa</i><br>strain PM389         | JF899310.2      | 99% |
| 3 | SB-40 | <i>Stenotrophomonas</i> sp. NOE3                      | JX842830.1      | 99% |
| 3 | SB-41 | <i>Pseudomonas aeruginosa</i><br>strain 9Cit          | JN969597.1      | 92% |
| 3 | SB-42 | <i>Pedobacter heparinus</i>                           | AB680215.1      | 97% |
| 3 | SB-43 | <i>Staphylococcus aureus</i> subsp.<br>aureus ST228   | HE579073.1      | 99% |
| 3 | SB-44 | <i>Verrucomicrobia</i> bacterium<br>SCGC AAA240-C14   | HQ675558.1      | 91% |
| 3 | SB-45 | <i>Verrucomicrobia</i> bacterium<br>SCGC AAA240-C14   | HQ675558.1      | 97% |
| 3 | SB-46 | <i>Verrucomicrobia</i> bacterium<br>SCGC AAA240-C14   | HQ675558.1      | 95% |
| 3 | SB-47 | <i>Delftia lacustris</i>                              | HE861943.1      | 99% |

---

|   |       |                                                      |                 |     |
|---|-------|------------------------------------------------------|-----------------|-----|
| 3 | SB-48 | <i>Pseudomonas aeruginosa</i><br>strain PM389        | JF899310.2      | 96% |
| 3 | SB-49 | <i>Mitsuaria</i> sp. H29L1B                          | EU714912.1      | 96% |
| 3 | SB-50 | <i>Tessaracoccus</i> sp.<br>SL014B-79A               | GU111568.2      | 93% |
| 3 | SB-51 | <i>Staphylococcus aureus</i> subsp.<br>aureus ST228  | HE579073.1      | 97% |
| 2 | SB-52 | <i>Pseudomonas aeruginosa</i><br>strain N83          | JQ900543.1      | 92% |
| 2 | SB-53 | <i>Pseudomonas aeruginosa</i>                        | AB037548.1      | 96% |
| 2 | SB-54 | <i>Pseudomonas aeruginosa</i><br>strain RsB-29       | DQ666628.1      | 94% |
| 2 | SB-55 | <i>Staphylococcus aureus</i> subsp.<br>aureus ST228  | HE579073.1      | 99% |
| 2 | SB-56 | <i>Stenotrophomonas maltophilia</i><br>strain GGI-22 | GU815943.1      | 96% |
| 2 | SB-57 | <i>Enterobacter</i> sp. DHL-02                       | AB714445.1      | 98% |
| 2 | SB-58 | <i>Roseateles</i> sp.<br>AKB-2008-KU7                | AM989118.1      | 95% |
| 2 | SB-59 | <i>Rhodothalassium salexigens</i>                    | FR682008.1      | 90% |
| 2 | SB-60 | <i>Micrococcus panaciterrae</i><br>strain Gsoil 954  | NR_041517.<br>1 | 92% |
| 2 | SB-61 | <i>Staphylococcus aureus</i> subsp.<br>aureus ST228  | HE579073.1      | 99% |
| 2 | SB-62 | <i>Afifella marina</i> strain P530                   | GU370095.1      | 88% |
| 2 | SB-63 | <i>Roseateles</i> sp. R-45571                        | FR775142.1      | 95% |
| 2 | SB-64 | <i>Klebsiella oxytoca</i> E718                       | CP003683.1      | 99% |
| 2 | SB-65 | <i>Verrucomicrobia</i> bacterium<br>SCGC AAA240-C14  | HQ675558.1      | 96% |
| 2 | SB-66 | <i>Stenotrophomonas maltophilia</i><br>clone FH030   | GU420674.1      | 97% |
| 2 | SB-67 | <i>Pseudomonas aeruginosa</i>                        | AY499109.1      | 99% |
| 2 | SB-68 | <i>Sphingomonadaceae</i><br>bacterium KF016          | AB269802.2      | 91% |
| 2 | SB-69 | <i>Pedobacter heparinus</i>                          | AB680215.1      | 94% |
| 2 | SB-70 | <i>Stenotrophomonas</i> sp. NOE8                     | JX842835.1      | 98% |
| 2 | SB-71 | <i>Desulfobulbus</i> sp.                             | AF132865.1      | 91% |
| 2 | SB-72 | <i>Stenotrophomonas</i> sp. NOE8                     | JX842835.1      | 97% |



|   |        |                                                            |                 |     |
|---|--------|------------------------------------------------------------|-----------------|-----|
| 2 | SB-73  | <i>Alcaligenes faecalis</i> strain N8                      | EU567029.1      | 98% |
| 2 | SB-74  | <i>Pseudomonas</i> sp. AMAAS232                            | JN391539.1      | 98% |
| 2 | SB-75  | <i>Staphylococcus aureus</i> subsp.<br>aureus ST228        | HE579073.1      | 99% |
| 2 | SB-76  | <i>Staphylococcus aureus</i> subsp.<br>aureus ST228        | HE579073.1      | 96% |
| 2 | SB-77  | <i>Microthricolunatus panaciterrae</i><br>strain Gsoil 954 | NR_041517.<br>1 | 91% |
| 2 | SB-78  | <i>Acidovorax</i> sp. CNE 29                               | FR749857.1      | 97% |
| 2 | SB-79  | <i>Desulfobulbus</i> sp.                                   | AF132865.1      | 97% |
| 2 | SB-80  | <i>Stenotrophomonas</i> sp. NOE8                           |                 | 94% |
| 2 | SB-81  | <i>Verrucomicrobia</i> bacterium<br>SCGC AAA240-C14        | HQ675558.1      | 93% |
| 1 | SB-82  | <i>Pedobacter heparinus</i>                                | AB680215.1      | 98% |
| 1 | SB-83  | <i>Alcaligenes faecalis</i> strain N8                      | EU567029.1      | 98% |
| 1 | SB-84  | <i>Verrucomicrobia</i> bacterium<br>SCGC AAA240-C14        | HQ675558.1      | 94% |
| 1 | SB-85  | <i>Sphingomonadaceae</i><br>bacterium KF016                | AB269802.2      | 90% |
| 1 | SB-86  | <i>Mitsuaria</i> sp. H29L1B                                | EU714912.1      | 89% |
| 1 | SB-87  | <i>Pseudomonas aeruginosa</i>                              | AB037548.1      | 94% |
| 1 | SB-88  | <i>Alcaligenes faecalis</i> strain N8                      | EU567029.1      | 97% |
| 1 | SB-89  | <i>Pseudomonas aeruginosa</i><br>strain S85R               | JF513140.1      | 94% |
| 1 | SB-90  | <i>Roseateles</i> sp. R-45571                              | FR775142.1      | 94% |
| 1 | SB-91  | <i>Enterobacter</i> sp. 2391                               | JX174268.1      | 92% |
| 1 | SB-92  | <i>Afifella marina</i> strain P530(0)                      | GU370095.1      | 88% |
| 1 | SB-93  | <i>Stenotrophomonas</i> sp. NOE8                           | JX842835.1      | 94% |
| 1 | SB-94  | <i>Pseudomonas aeruginosa</i><br>strain NGKCTS             | FJ556919.1      | 95% |
| 1 | SB-95  | <i>Pseudomonas aeruginosa</i><br>strain ASFP-38            | HQ018741.1      | 98% |
| 1 | SB-96  | <i>Roseateles</i> sp. MC12                                 | AB013425.1      | 92% |
| 1 | SB-97  | <i>Desulfobulbus</i> sp.                                   | AF132865.1      | 97% |
| 1 | SB-98  | <i>Pseudomonas aeruginosa</i><br>strain TERIPS9002         | AY499109.1      | 97% |
| 1 | SB-99  | <i>Porphyrobacter cryptus</i>                              | FR774566.1      | 87% |
| 1 | SB-100 | <i>Porphyrobacter cryptus</i>                              | FR774566.1      | 89% |

|   |        |                                                            |                 |     |
|---|--------|------------------------------------------------------------|-----------------|-----|
| 1 | SB-101 | <i>Roseateles</i> sp. R-45571                              | FR775142.1      | 97% |
| 1 | SB-102 | <i>Pedobacter heparinus</i>                                | AB680215.1      | 97% |
| 1 | SB-103 | <i>Pseudomonas aeruginosa</i><br>strain XRF-6              | GU212673.1      | 99% |
| 1 | SB-104 | <i>Desulfobulbus</i> sp.                                   | AF132865.1      | 99% |
| 1 | SB-105 | <i>Sphingomonadaceae</i><br>bacterium KF016                | AB269802.2      | 89% |
| 1 | SB-106 | <i>Pseudomonas aeruginosa</i><br>strain PM389              | JF899310.2      | 97% |
| 1 | SB-107 | <i>Sphingomonadaceae</i><br>bacterium KF016                | AB269802.2      | 91% |
| 1 | SB-108 | <i>Sphingomonadaceae</i><br>bacterium KF016                | AB269802.2      | 88% |
| 1 | SB-109 | <i>Enterobacter oryzae</i> strain<br>R5-362                | JQ659749.1      | 95% |
| 1 | SB-110 | <i>Stenotrophomonas</i> sp. NOE8                           | JX842835.1      | 99% |
| 1 | SB-111 | <i>Pseudomonas aeruginosa</i><br>strain PM389              | JF899310.2      | 98% |
| 1 | SB-112 | <i>Sphingomonas</i> sp. V3M21                              | FN794222.1      | 93% |
| 1 | SB-113 | <i>Pedobacter heparinus</i>                                | AB680215.1      | 96% |
| 1 | SB-114 | <i>Acidovorax</i> sp. CNE 29                               | FR749857.1      | 91% |
| 1 | SB-115 | <i>Microlunatus</i> sp. M5_21                              | AB468984.1      | 90% |
| 1 | SB-116 | <i>Desulfobulbus</i> sp.                                   | AF132865.1      | 97% |
| 1 | SB-117 | <i>Tessaracoccus</i> sp.<br>SL014B-79A                     | GU111568.2      | 89% |
| 1 | SB-118 | <i>Verrucomicrobia</i> bacterium<br>SCGC AAA240-C14        | HQ675558.1      | 92% |
| 1 | SB-119 | <i>Microlunatus panaciterrae</i><br>strain Gsoil 954       | NR_041517.<br>1 | 92% |
| 1 | SB-120 | <i>Pedobacter heparinus</i>                                | AB680215.1      | 98% |
| 1 | SB-121 | <i>Desulfobulbus</i> sp.                                   | AF132865.1      | 91% |
| 1 | SB-122 | <i>Porphyrobacter cryptus</i>                              | FR774566.1      | 91% |
| 1 | SB-123 | <i>Pseudomonas aeruginosa</i><br>strain PM389              | JF899310.2      | 99% |
| 1 | SB-124 | <i>Roseateles</i> sp. R-45571                              | FR775142.1      | 95% |
| 1 | SB-125 | <i>Staphylococcus aureus</i> subsp.<br><i>aureus</i> ST228 | HE579073.1      | 96% |
| 1 | SB-126 | <i>Roseateles</i> sp. R-45571                              | FR775142.1      | 94% |

|   |        |                                                         |                 |      |
|---|--------|---------------------------------------------------------|-----------------|------|
| 1 | SB-127 | <i>Enterobacter</i> sp. SP1                             | JQ001784.1      | 99%  |
| 1 | SB-128 | <i>Pseudomonas</i> sp. PC IW 25                         | FM164626.1      | 97%  |
| 1 | SB-129 | <i>Pseudomonas aeruginosa</i>                           | AB062598.1      | 96%  |
| 1 | SB-130 | <i>Musa acuminata</i>                                   | EU017026.1      | 99%  |
| 1 | SB-131 | <i>Pseudomonas aeruginosa</i><br>strain TERIPS9002      | AY499109.1      | 97%  |
| 1 | SB-132 | <i>Verrucomicrobia</i> bacterium<br>SCGC AAA240-C14     | HQ675558.1      | 96%  |
| 1 | SB-133 | <i>Pedobacter heparinus</i>                             | AB680215.1      | 91%  |
| 1 | SB-134 | <i>Pseudomonas stutzeri</i>                             | EU520400.1      | 90%  |
| 1 | SB-135 | <i>Microtholunatus panaciterrae</i><br>strain Gsoil 954 | NR_041517.<br>1 | 93%  |
| 1 | SB-136 | <i>Tessaracoccus</i> sp.<br>SL014B-79A                  | GU111568.2      | 92%  |
| 1 | SB-137 | <i>Pedobacter heparinus</i>                             | AB680215.1      | 93%  |
| 1 | SB-138 | <i>Pseudomonas aeruginosa</i><br>strain M10             | JQ927361.1      | 100% |
| 1 | SB-139 | <i>Sneathiella</i> sp. BFLP-8                           | FN687912.1      | 87%  |
| 1 | SB-140 | <i>Pseudomonas</i> sp. RB5-M5                           | JN019027.1      | 97%  |
| 1 | SB-141 | <i>Pedobacter</i> sp. 9-15                              | HM151618.1      | 96%  |
| 1 | SB-142 | <i>Pseudomonas aeruginosa</i>                           | AB680503.1      | 95%  |
| 1 | SB-143 | <i>Mitsuaria</i> sp. RV4                                | JQ433927.1      | 91%  |
| 1 | SB-144 | <i>Pantoea agglomerans</i> strain<br>GS2                | GQ374474.1      | 93%  |
| 1 | SB-145 | <i>Delftia acidovorans</i> strain<br>IAC/BECa-020       | JX155410.1      | 98%  |
| 1 | SB-146 | <i>Pseudomonas</i> sp. INBio2893C                       | HM771055.1      | 91%  |
| 1 | SB-147 | <i>Rhodothalassium salexigens</i>                       | FR682008.1      | 90%  |
| 1 | SB-148 | <i>Pedobacter heparinus</i>                             | AB680215.1      | 96%  |
| 1 | SB-149 | <i>Enterobacter cloacae</i> strain<br>M-5               | HM030748.1      | 99%  |
| 1 | SB-150 | <i>Desulfobulbus</i> sp.                                | AF132865.1      | 94%  |

TABLE S8. The dereplication hits of active archaeal 16S ribosomal cDNA based on 98% similarity

| <b>No. of reads</b> | <b>Dereplicated representative</b> | <b>Best hit</b>                                                   | <b>Accession No.</b> | <b>Identity</b> |
|---------------------|------------------------------------|-------------------------------------------------------------------|----------------------|-----------------|
| 206                 | SA-1                               | <i>Candidatus</i><br>Nitrososphaera<br>gargensis clone<br>RHGA41c | EU281334.1           | 84%             |
| 172                 | SA-2                               | anaerobic<br>methanogenic<br>archaeon ET1-9                       | AJ244285.1           | 94%             |
| 168                 | SA-3                               | <i>Vulcanisaeta</i> sp.<br>CBA1501                                | HM594677.1           | 99%             |
| 116                 | SA-4                               | <i>Candidatus</i><br>Nitrososphaera<br>gargensis                  | CP002408.1           | 86%             |
| 82                  | SA-5                               | <i>Thermoproteus</i><br><i>uzoniensis</i> 768-20                  | CP002590.1           | 98%             |
| 49                  | SA-6                               | <i>Vulcanisaeta</i><br><i>distributa</i>                          | AB063641.1           | 87%             |
| 36                  | SA-7                               | <i>Aeropyrum</i> <i>pernix</i>                                    | AB263905.1           | 86%             |
| 33                  | SA-8                               | <i>Thermogladius</i><br><i>cellulolyticus</i> 1633                | CP003531.1           | 85%             |
| 24                  | SA-9                               | <i>Sulfolobus</i> sp. JP3                                         | AY907890.1           | 95%             |
| 13                  | SA-10                              | anaerobic<br>methanogenic<br>archaeon ET1-8                       | AJ244284.1           | 95%             |
| 9                   | SA-11                              | anaerobic<br>methanogenic<br>archaeon ET1-9                       | AJ244285.1           | 93%             |
| 8                   | SA-12                              | <i>Candidatus</i><br>Nitrosocaldus<br>yellowstonii strain<br>HL72 | EU239960.1           | 99%             |
| 6                   | SA-13                              | <i>Desulfurococcus</i><br><i>amylolyticus</i>                     | AB661712.1           | 86%             |
| 4                   | SA-14                              | Methanobacterium sp.<br>AL-21                                     | CP002551.1           | 99%             |

---

|   |       |                                                                   |             |     |
|---|-------|-------------------------------------------------------------------|-------------|-----|
| 3 | SA-15 | <i>Candidatus</i><br>Nitrososphaera<br>gargensis Ga9.2            | CP002408.1  | 85% |
| 3 | SA-16 | <i>Thermogymnomonas</i><br><i>acidicola</i> strain JCM<br>13583   | NR_041513.1 | 87% |
| 3 | SA-17 | <i>Vulcanisaeta</i> sp.<br>CBA1501                                | HM594677.1  | 85% |
| 1 | SA-18 | <i>Candidatus</i><br>Nitrososphaera<br>gargensis clone<br>RHGA41c | EU281334.1  | 83% |
| 1 | SA-19 | <i>Vulcanisaeta</i> sp.<br>CBA1501                                | HM594677.1  | 97% |
| 1 | SA-20 | <i>Vulcanisaeta</i> sp.<br>CBA1501                                | HM594677.1  | 90% |
| 1 | SA-21 | <i>Methanocella</i><br><i>arvoryzae</i> MRE50                     | AM114193.2  | 92% |
| 1 | SA-22 | <i>Vulcanisaeta</i> sp.<br>CBA1501                                | HM594677.1  | 92% |
| 1 | SA-23 | <i>Pyrobaculum</i> sp. D11                                        | AJ630373.1  | 99% |
| 1 | SA-24 | <i>Candidatus</i><br>Nitrososphaera<br>gargensis Ga9.2            | CP002408.1  | 85% |
| 1 | SA-25 | <i>Vulcanisaeta</i><br><i>distributa</i>                          | AB063641.1  | 86% |

---

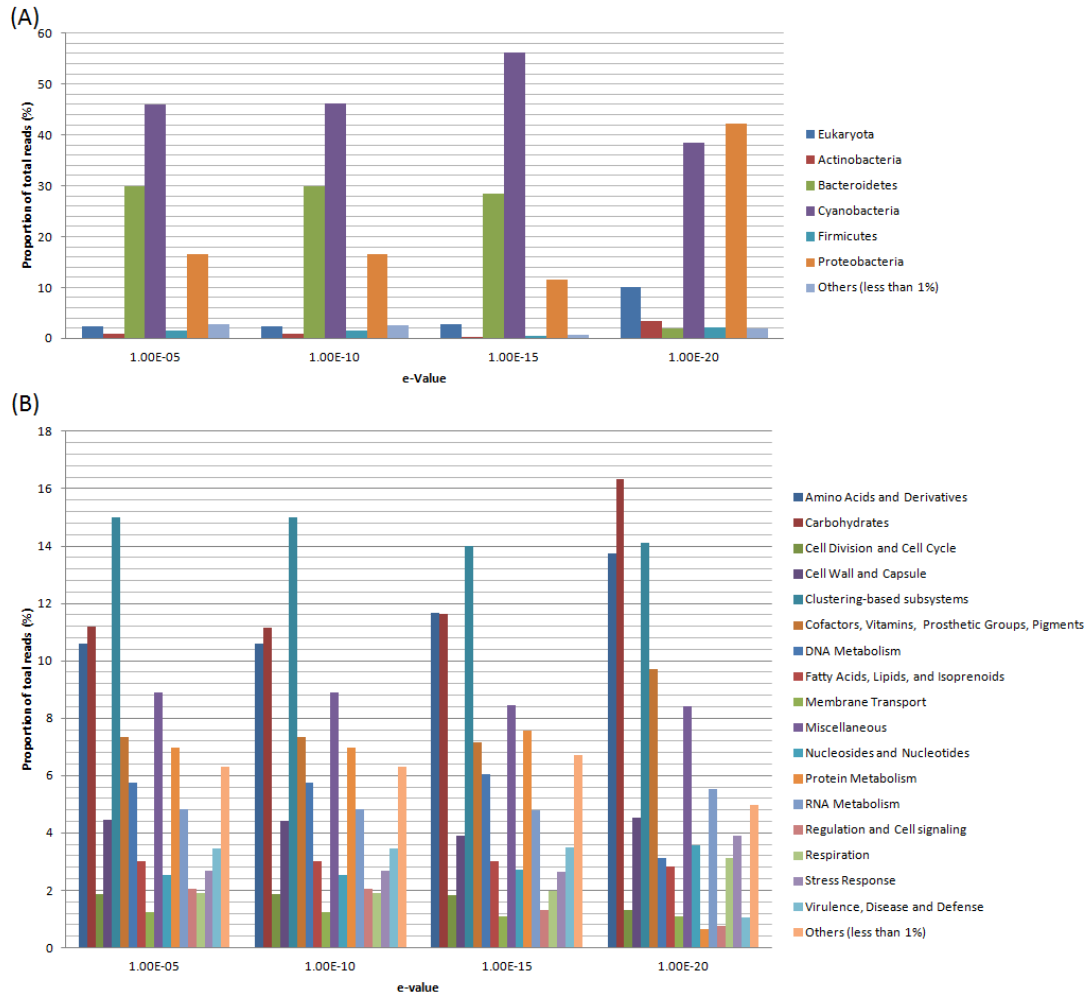

FIG S1 The proportions of (A) taxonomic and (B) functional classifications of the total metagenomic reads under E values  $\leq 10^{-5}$ ,  $10^{-10}$ ,  $10^{-15}$ , and  $10^{-20}$  at phylum (except Eukaryota) and subsystem levels.

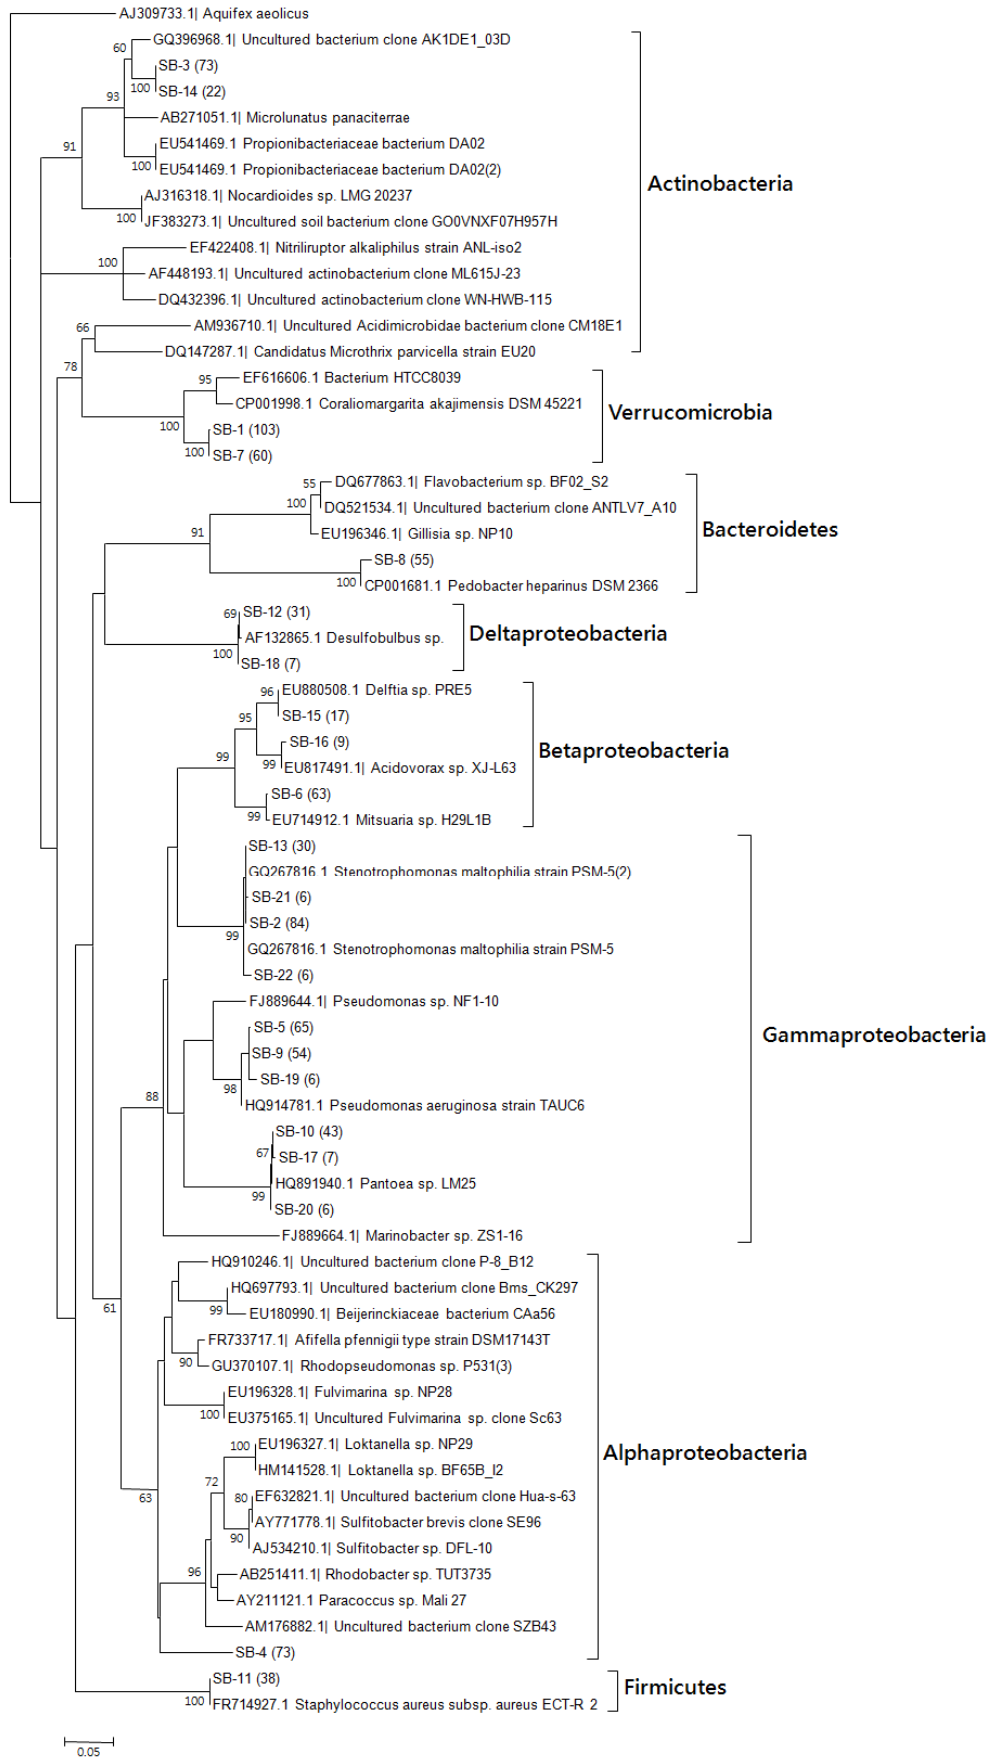

FIG S2.

Neighbor-joining phylogenetic tree of the bacterial representative sequences from the LH 16S ribosomal cDNA pyrosequencing dataset with the number of representing reads indicated in parentheses. Bootstrap values  $\geq 60\%$  of 1000 replicates are indicated at the nodes.



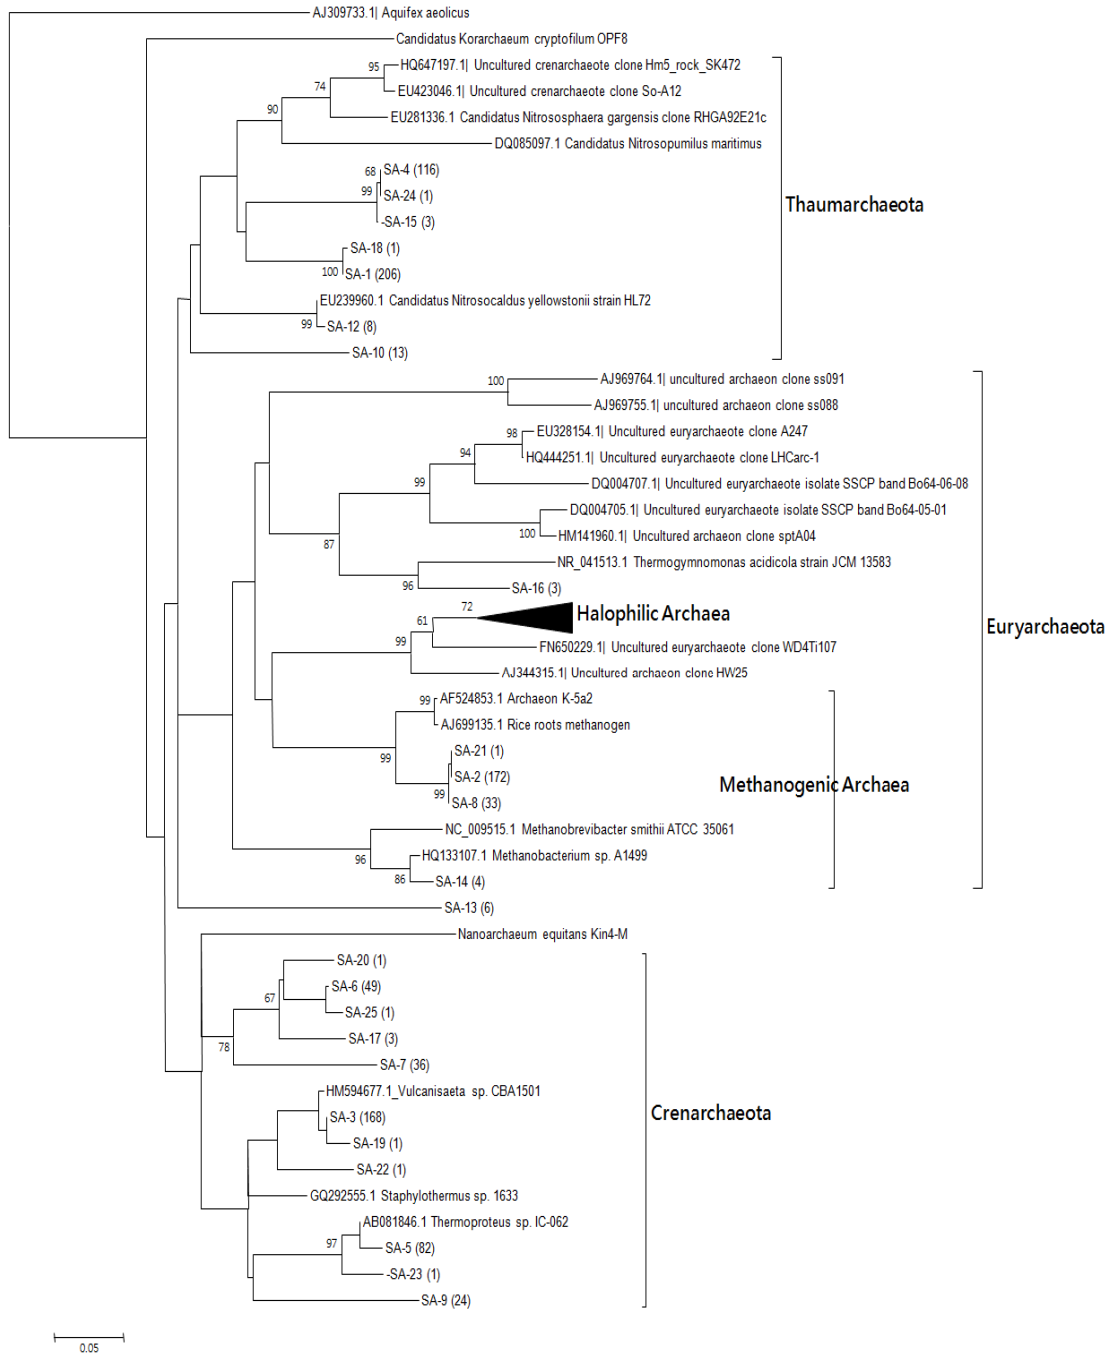

FIG S3.

Neighbor-joining phylogenetic tree of the archaeal representative sequences from the LH 16S ribosomal cDNA pyrosequencing dataset with the number of representing reads indicated in parentheses. Bootstrap values  $\geq 60\%$  of 1000 replicates are indicated at the nodes.

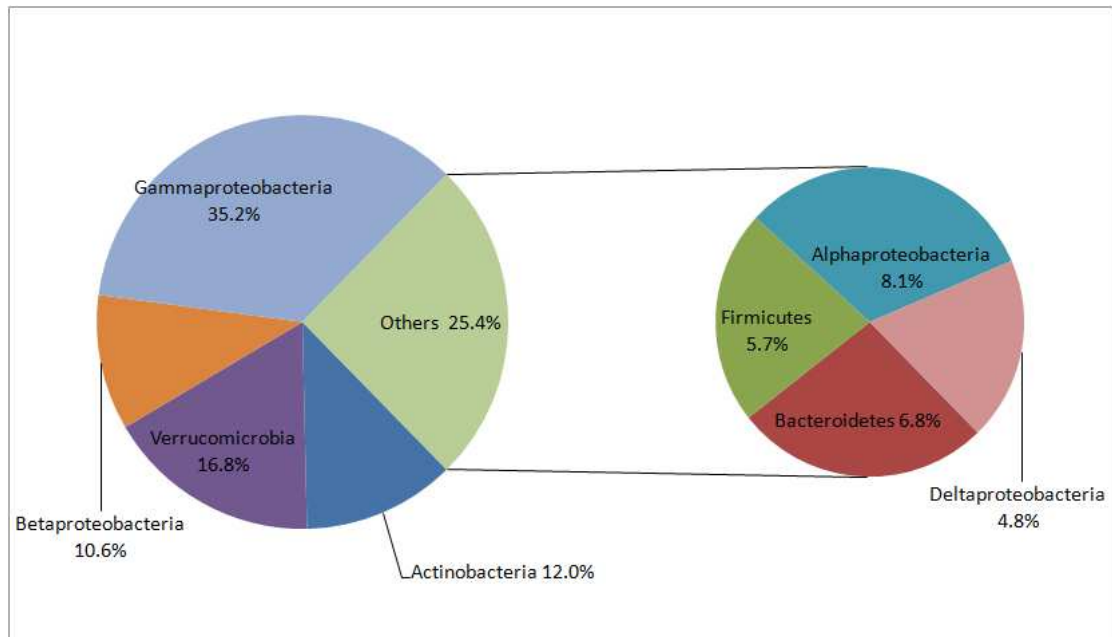

FIG S4.

The active bacterial composition of LH spring sediments based on 16S ribosomal cDNA pyrosequencing analyses.

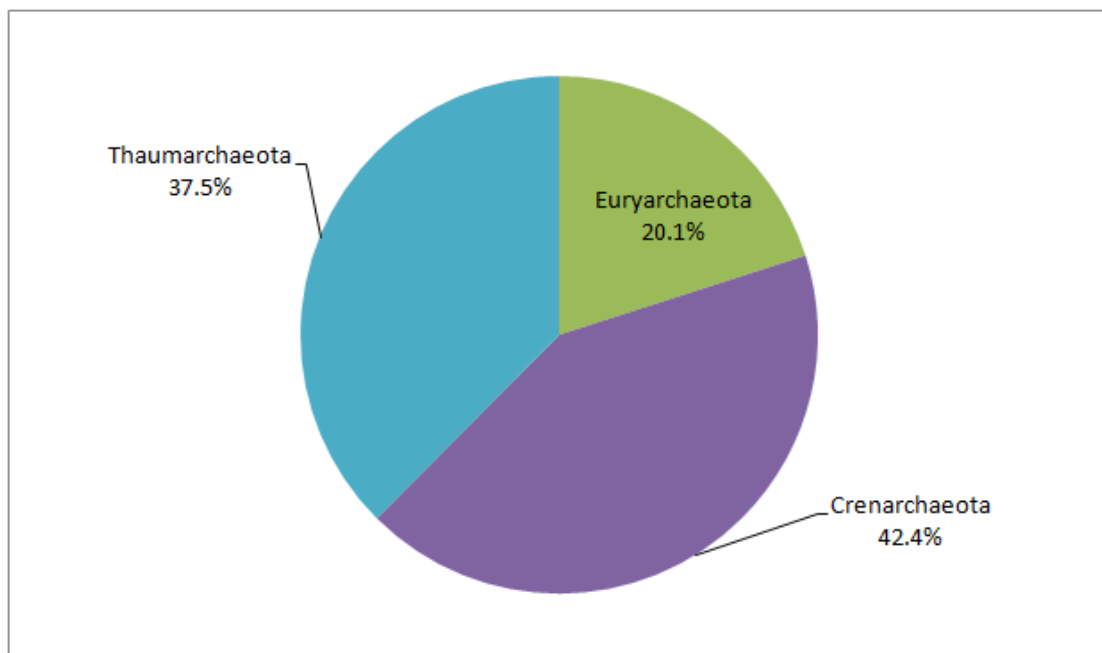

FIG S5.

The active archaeal composition of LH spring sediments based on 16S ribosomal cDNA pyrosequencing analyses.

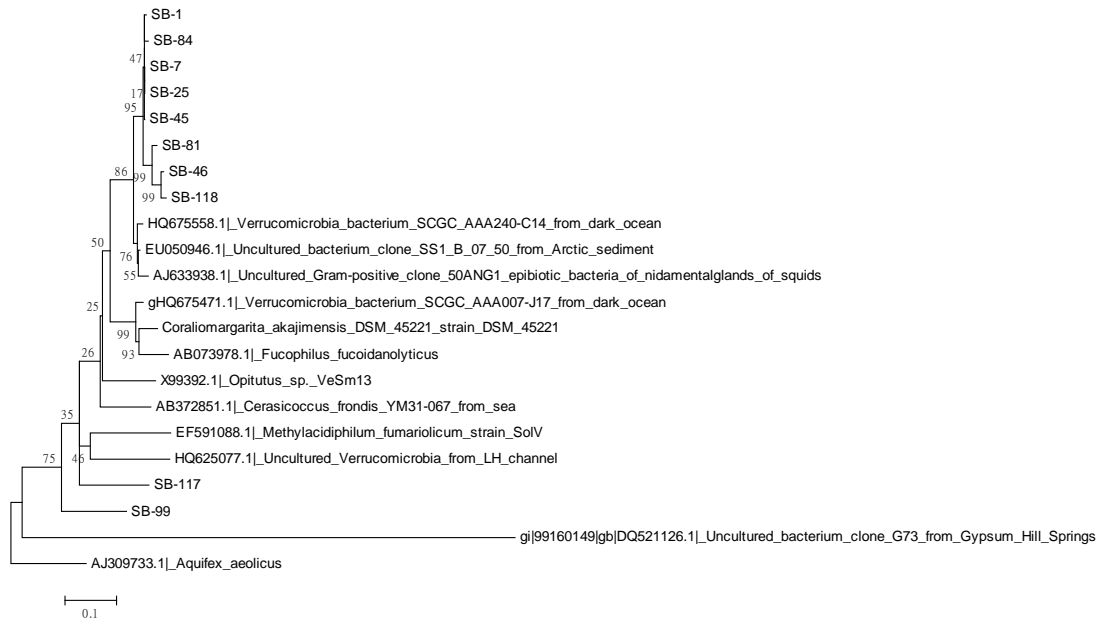

FIG S6.

Neighbor-joining phylogenetic tree of the verrucomicrobial representative sequences (phylotypes with the initial of SB) from the LH 16S ribosomal cDNA pyrosequencing dataset based on 437 bp. EF591088 is a sequence of methanotrophic *Verrucomicrobia* and its clustering sequence (HQ625077.1) originates from a clone of our previous study on LH channel sediment.
